# Supplementary material for: A steep one-step [HS–HS] to [LS–LS] spin transition in a 4,4′-bipyridine linked one-dimensional coordination polymer constructed from a pyrazolato bridged Fe(ii) dimer
Source: Royal Society of Chemistry journal article supplement (doi:10.1039/b512266j), 2005-10-20
Supplement: b512266j.pdf [file b512266j.pdf]

Supplementary Information  
for

A Steep Single [HS-HS] to [LS-LS] Spin Transition in a 4,4'-  
Bipyridine Linked One-Dimensional Coordination Polymer  
Constructed from a Pyrazolato Bridged Fe(II) Dimer

Ko Yoneda,<sup>a</sup> Keiichi Adachi,<sup>a</sup> Shinya Hayami,<sup>b</sup> Yonezo  
Maeda,<sup>b</sup> Motomi Katada,<sup>c</sup> Akira Fuyuhiko,<sup>a</sup> Satoshi  
Kawata,<sup>\*,a</sup> and Sumio Kaizaki<sup>\*,a</sup>

<sup>a</sup> Department of Chemistry, Graduate School of Science,  
Osaka University, Toyonaka, Osaka 560-0043, Japan. E-  
mail: [kawata@chem.sci.osaka-u.ac.jp](mailto:kawata@chem.sci.osaka-u.ac.jp); Fax: +81-6-6850-  
5473

<sup>b</sup> Department of Chemistry, Graduate School of Science,  
Kyushu University, Fukuoka 812-8581, Japan

<sup>c</sup> Department of Chemistry, Graduate School of Science,  
Tokyo Metropolitan University, Hachioji 192-0397,  
Japan

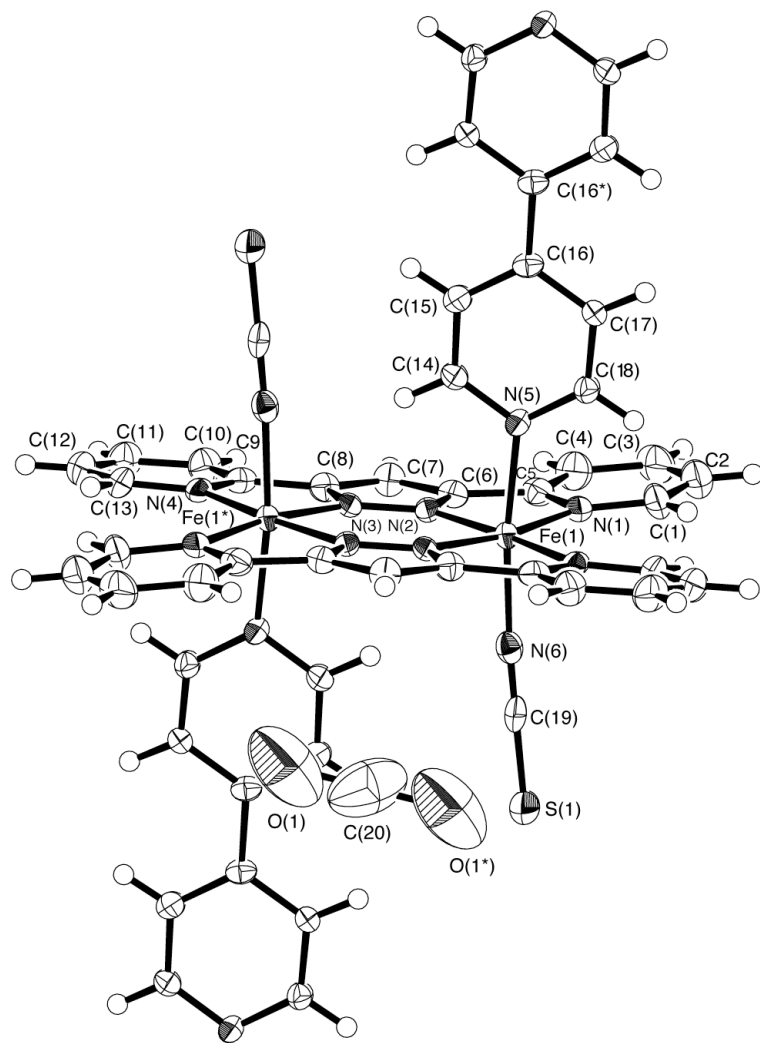

Fig. S1. ORTEP drawing for  $[\{\text{Fe}^{\text{II}}_2(\text{NCS})_2(\mu\text{-bpypz})_2\}(\mu\text{-4,4}'\text{-bpy})]\cdot\text{MeOH}$  at 150 K

297 K

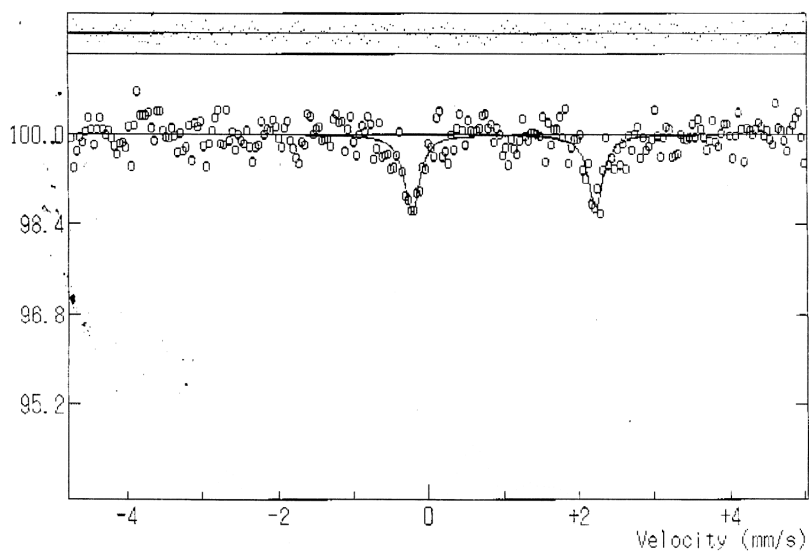

168 K

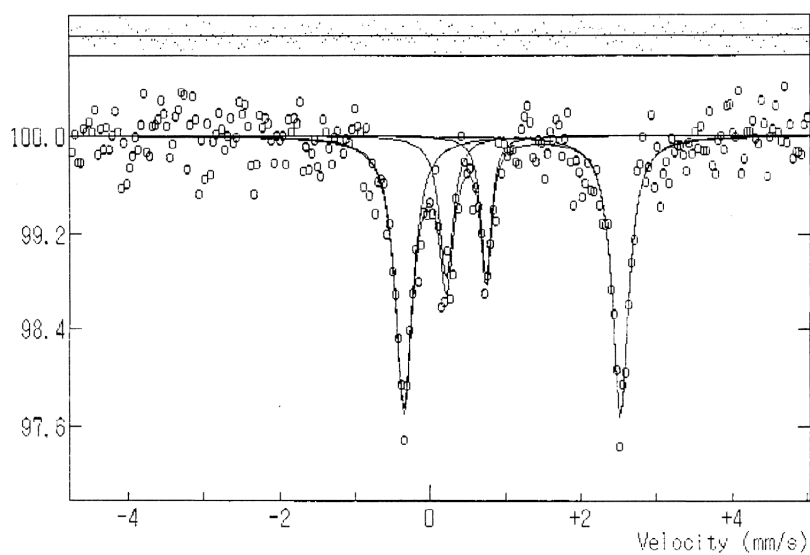

79.5 K

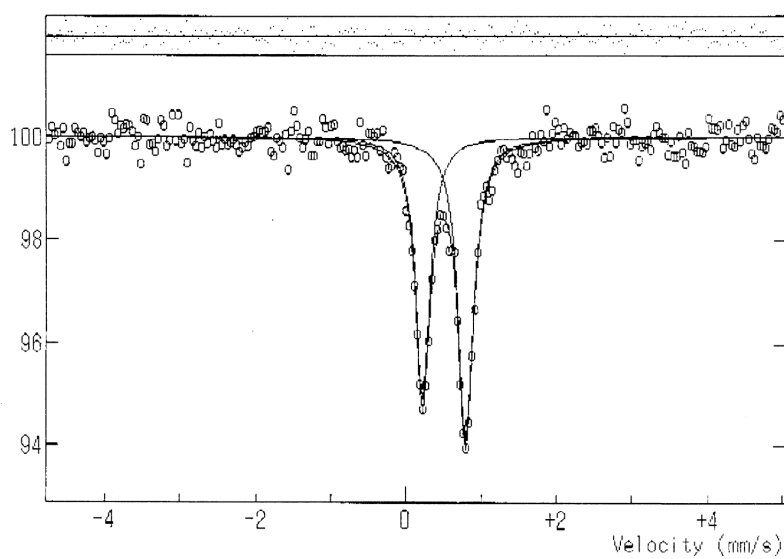

Fig. S2. Mössbauer spectra of  $[\{Fe^{II}_2(NCS)_2(\mu\text{-bpy}pz)_2\}(\mu\text{-4,4'}\text{-bpy})]\cdot\text{MeOH}$ .

Cooling Mode

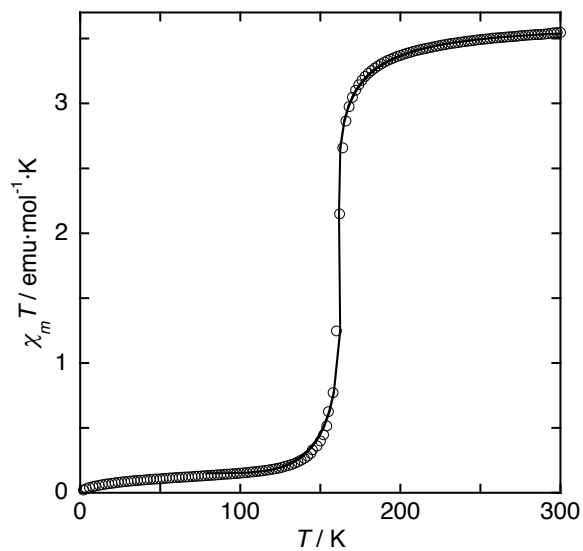

Heating Mode

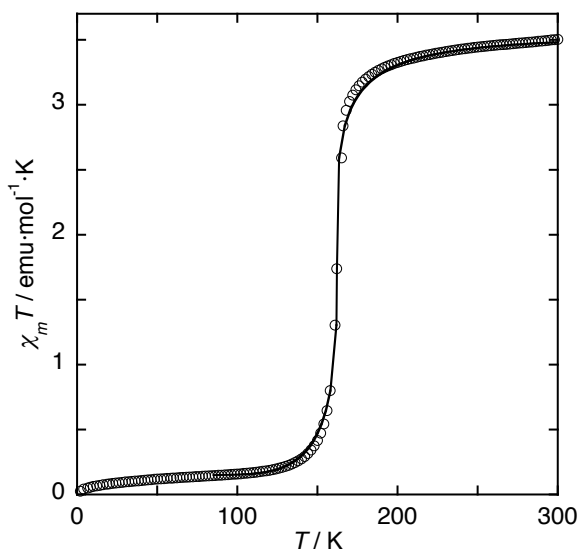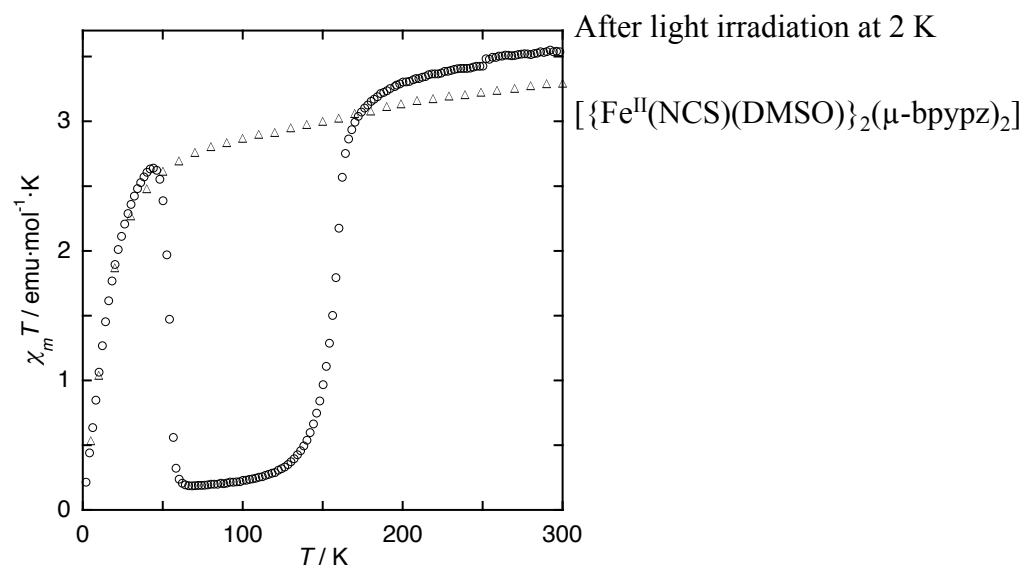

Fig. S3. Temperature dependence of  $\chi_M T$  for  $[\{\text{Fe}^{\text{II}}_2(\text{NCS})_2(\mu\text{-bpyz})_2\}(\mu\text{-4,4}'\text{-bpy})] \cdot \text{MeOH}$ .

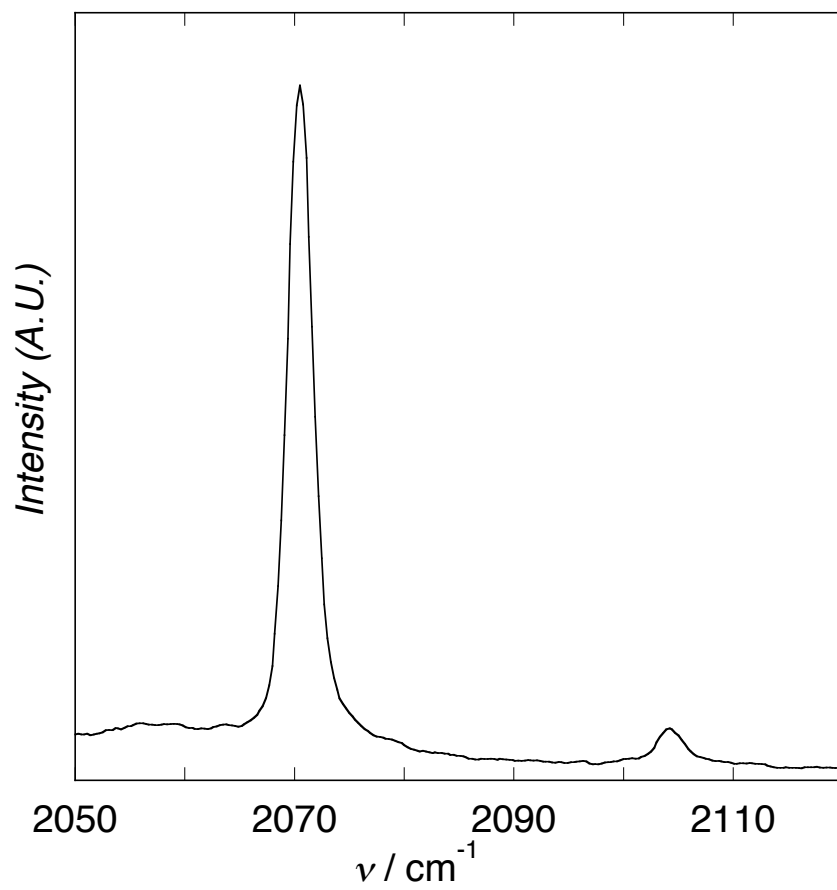

Fig. S4. Raman Spectrum of [ $\{\text{Fe}^{\text{II}}_2(\text{NCS})_2(\mu\text{-bpypz})_2\}(\mu\text{-4,4'-bpy})\} \cdot \text{MeOH}$ ] at 10 K.
